# Supplementary material for: Formononetin inhibits tumor growth by suppression of EGFR-Akt-Mcl-1 axis in non-small cell lung cancer
Source: Springer Nature journal article supplement (doi:10.1186/s13046-020-01566-2), 2020-04-10
Supplement: MOESM1 [file 17885668]

## Supplementary Figure legends

Figure S1. The effect of formononetin (Formo) on anchorage-independent cell growth of NSCLC cells. H3255 (A), H1975 (B), A549 (C), H1299 (D), and HCC827 OR (E) cells were treated with Formo or osimertinib (Osi), anchorage-independent cell growth was analyzed by soft agar assay. Scale bar, 200  $\mu\text{m}$ . Osi, osimertinib.

Figure S2. Flow cytometry analysis of apoptotic cell population in Formo-treated HCC827 cells. A, HCC827 cells were treated with Formo for 24 h, apoptotic cells were analyzed by flow cytometry. B, HCC827 cells were transfected with Mcl-1 and treated with Formo (10  $\mu\text{M}$ ) for 24 h, apoptotic cells were analyzed by flow cytometry.

Figure S3. Akt inhibition or depletion promotes Formo-induced apoptosis. A, HCC827 cells expressing shGFP or shAkt1 were treated with 10  $\mu\text{M}$  Formo for 24 h, the live cell population was determined by trypan blue exclusion assay. B, HCC827 cells expressing shGFP or shAkt1 were treated with 10  $\mu\text{M}$  Formo for 24 h, whole cell extract was prepared and subjected to caspase 3 activity analysis. \*\*\*,  $p < 0.001$ .

Figure S4. GSK3 $\beta$  regulates Mcl-1 phosphorylation and expression. HCC827 cells were treated with SB216763 for 24 h, whole cell extract was subjected to immunoblotting (IB) analysis.

Figure S5. Formo inhibits the *in vivo* tumor growth of NSCLC cells. A-D, The image of HCC827- (A), H3255- (B), H1975- (C), and A549 (D)-derived xenograft tumors with the vehicle control, Formo, or Osi treatment. E-G, Formo inhibits the *in vivo* tumor growth of H1299 cells. Tumor volume (E), the image of tumor mass (F), and tumor weight (G) of H1299 xenograft tumors treated with the vehicle control, Formo, or Osi. H-J, Formo inhibits the *in vivo* tumor growth of HCC827 OR cells. Tumor volume (H), the image of tumor mass (I), and tumor weight (J) of HCC827 OR xenograft tumors treated with the vehicle control, Formo, or Osi. \*\*,  $p < 0.01$ ; \*\*\*,  $p < 0.001$ . ns, not statistically significant. Scale bar, 1 cm.

Figure S6. Toxicity analysis for treatment with Formo and Osi. A, Body weight of HCC827 xenograft tumor bearing mice with the vehicle, Formo, or Osi treatment. B, Blood analysis of mice with the vehicle, Formo, or Osi treatment. ns, not statistically significant.

# Supplementary Figure 1

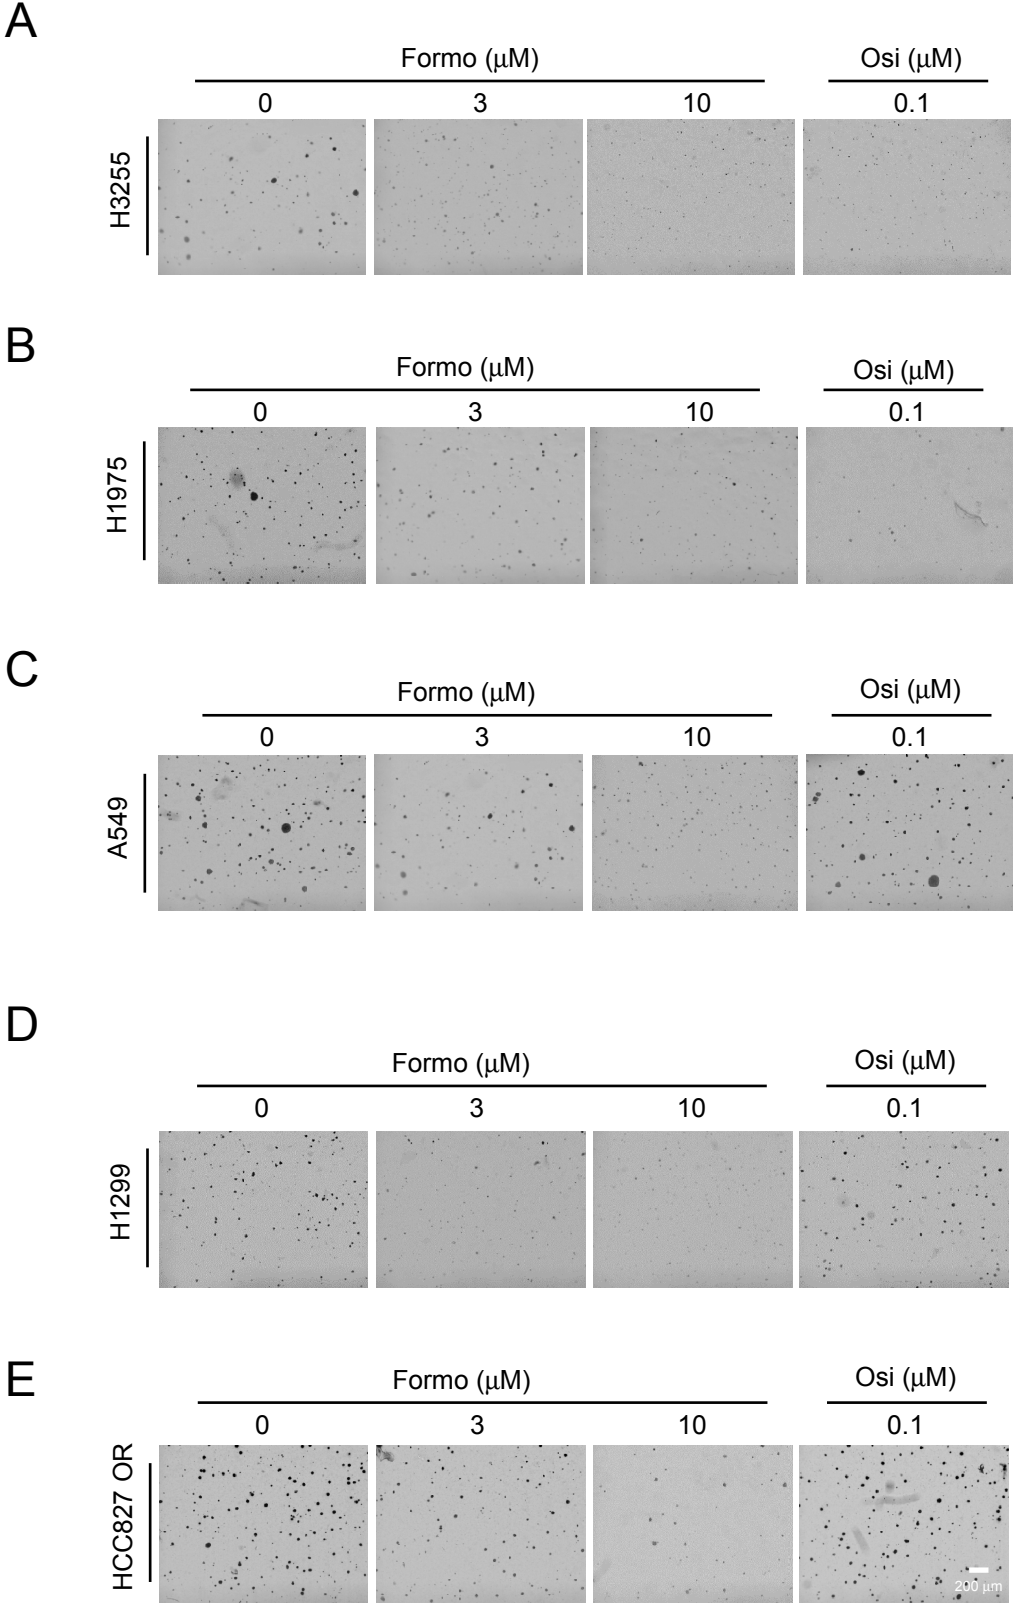

# Supplementary Figure 2

## A

|                         |   |   |    |
|-------------------------|---|---|----|
| DMSO                    | + | - | -  |
| Formo ( $\mu\text{M}$ ) | - | 3 | 10 |

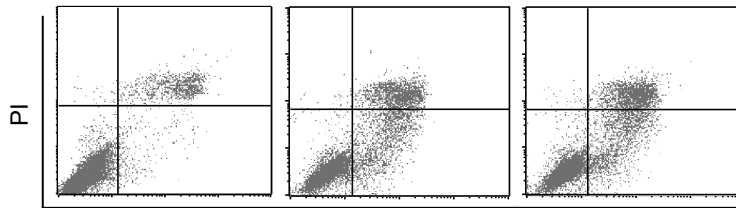

Annexin-V

## B

|                           |   |   |   |   |
|---------------------------|---|---|---|---|
| Formo (10 $\mu\text{M}$ ) | - | + | - | + |
| Mcl-1                     | - | - | + | + |

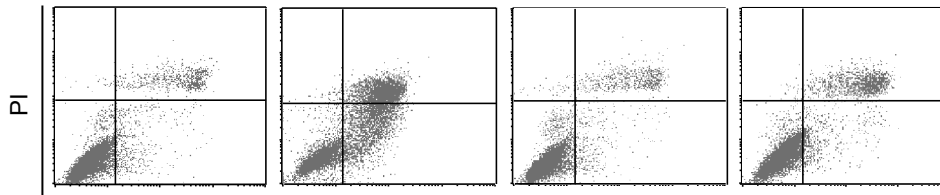

Annexin-V

# Supplementary Figure 3

A

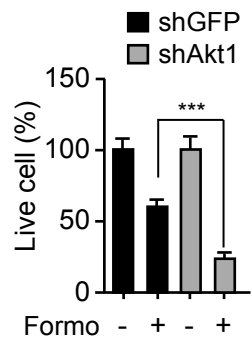

B

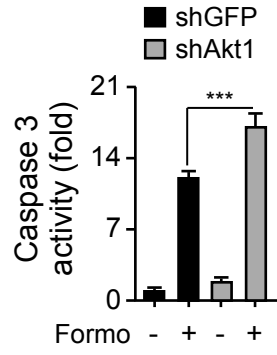

# Supplementary Figure 4

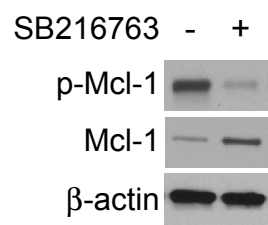

# Supplementary Figure 5

A

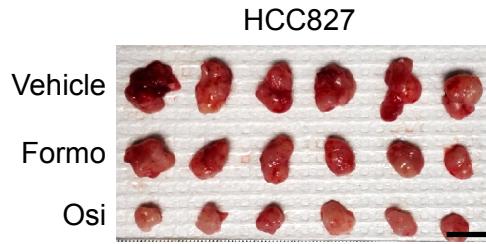

B

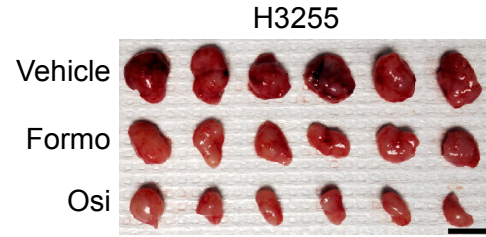

C

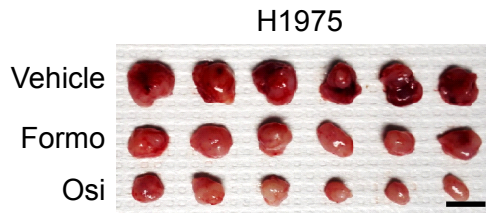

D

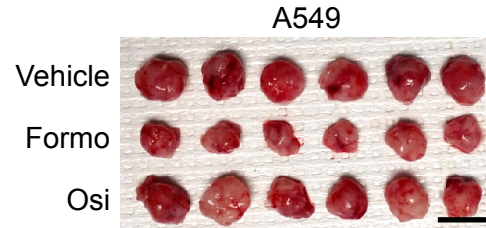

E

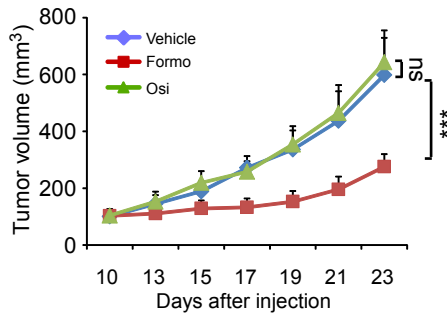

F

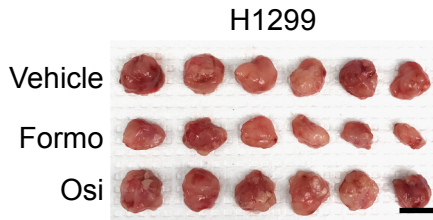

G

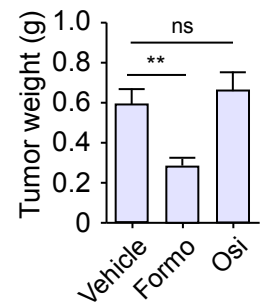

H

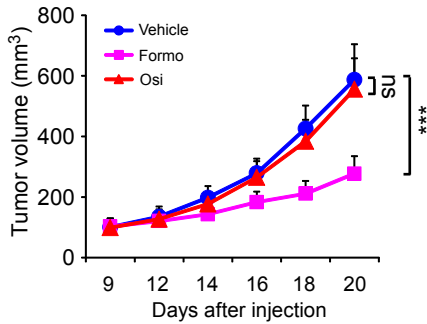

I

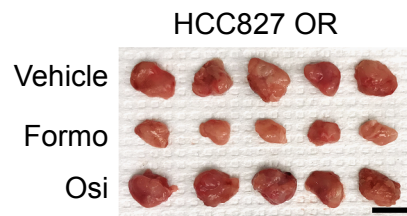

J

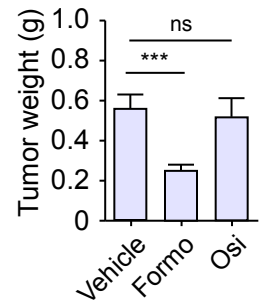

# Supplementary Figure 6

## A

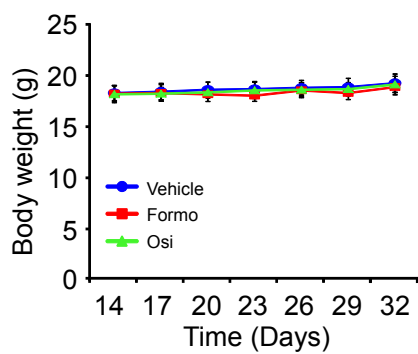

## B

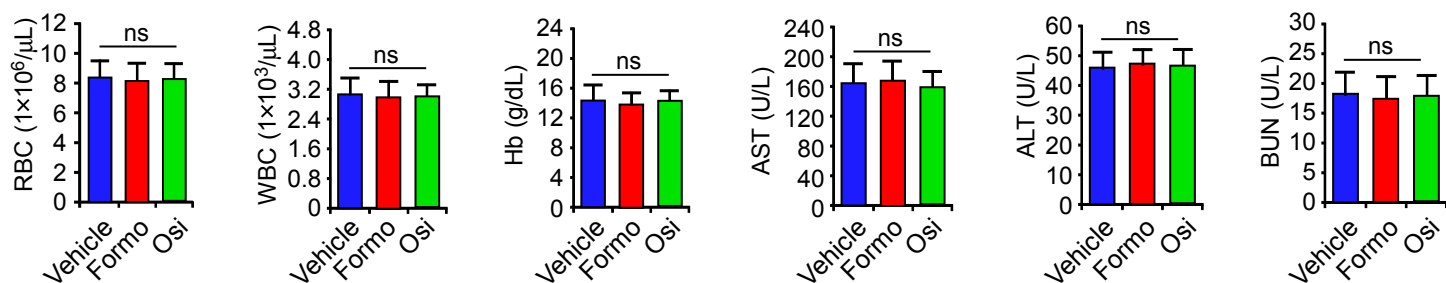



## Table S1 Screened compound list

| Name                                 | Name                                |
|--------------------------------------|-------------------------------------|
| DMSO                                 | Balofloxacin                        |
| Aloe-emodin                          | Clindamycin palmitate HCl           |
| Alizarin                             | Dopamine hydrochloride (Inotropin)  |
| Rutaecarpine (Rutecarpine)           | Uridine                             |
| Puerarin (Kakonein)                  | Econazole nitrate (Spectazole)      |
| Silymarin (Silybin B)                | Fluconazole                         |
| Naringin (Naringoside)               | Capsaicin                           |
| Baicalein                            | Dextrose (D-glucose)                |
| Chrysin                              | Tetrahydropapaverine hydrochloride  |
| Inosine                              | Artemether                          |
| Resveratrol                          | Oxymatrine (Matrine N-oxide)        |
| Daphnetin                            | All-trans Retinoic Acid (Tretinoin) |
| Piperine (1-Piperoylpiperidine)      | Bilobalide                          |
| 4-Methylumbelliferone (4-MU)         | Atropine sulfate monohydrate        |
| Adenine hydrochloride                | Voriconazole                        |
| Chlorogenic acid                     | Quinine hydrochloride dihydrate     |
| Aesculin (Esculin)                   | Forskolin                           |
| EGCG                                 | Xylose                              |
| Linezolid (Zyvox)                    | Ursodiol (Actigal Urso)             |
| Nalidixic acid (NegGram)             | Ginkgolide A                        |
| Taxifolin (Dihydroquercetin)         | Azomycin (2-Nitroimidazole)         |
| Neohesperidin dihydrochalcone (Nhdc) | Ginkgolide B                        |
| Amygdalin                            | Oridonin (Isodonol)                 |
| Myricetin (Cannabiscetin)            | Cortisone acetate (Cortone)         |
| Troxerutin                           | Sinomenine (Cucoline)               |
| Genistein                            | Gatifloxacin                        |
| Osthole (Osthol)                     | Rotenone (Barbasco)                 |
| Novobiocin sodium (Albamycin)        | Gambogic Acid                       |
| Meropenem                            | 4'-Demethylepipodophyllotoxin       |
| Cefoperazone (Cefobid)               | L-Thyroxine                         |
| Quercetin dihydrate (Sophoretin)     | Dehydroepiandrosterone (DHEA)       |
| Tigecycline                          | Sclareolide (Norambreinolide)       |
| Silibinin (Silybin)                  | Dexamethasone                       |
| Acarbose                             | Celastrol                           |
| Guanosine                            | 5-Aminolevulinic acid hydrochloride |
| Albendazole (Albenza)                | Artesunate                          |
| Asaraldehyde (Asaronaldehyde)        | Vincristine Sulfate                 |
| Cyclocytidine HCl                    | Clotrimazole (Canesten)             |
| Adenosine (Adenocard)                | Roxithromycin (Roxl-150)            |
| Mycophenolic acid                    | Clarithromycin (Biaxin Klacid)      |
| Myricitrin (Myricitrine)             | Shikimic acid (Shikimate)           |
| Synephrine HCl                       | Idebenone                           |
| Orotic acid (6-Carboxyuracil)        | Natamycin                           |
| Paeonol (Peonol)                     | Caffeic acid                        |
| Reserpine                            | 2-Methoxyestradiol                  |
| Nitrofurazone (Nitrofurazone)        | Artemisinin                         |
| Cefdinir (Omnicef)                   | Lincomycin hydrochloride (Lincocin) |
| Tebipenem pivoxil (L-084)            | Formononetin                        |
| Cinchonidine                         | Cloxacillin sodium                  |
| L-Adrenaline (Epinephrine)           |                                     |
